# Supplementary material for: First principles study on stability and hydrogen adsorption properties of Mg/Ti interface
Source: Royal Society of Chemistry journal article supplement (doi:10.1039/c5cp02005k), 2015-01-01
Supplement: c5cp02005k1.pdf [file c5cp02005k1.pdf]

# First principles study on stability and hydrogen adsorption properties of Mg/Ti interface

J. H. Dai, R.W. Xie, Y. Y. Chen, and Y. Song\*

*School of Materials Science and Engineering, Harbin Institute of Technology at Weihai, 2  
West Wenhua Road, Weihai 264209, China*

## Supporting Information: Calculation Details

Fig. S1 The detailed tests about the dependence of total energy of Mg/Ti interface on (a) the k-point grids and (b) energy cutoff for a (2×2) slab model.

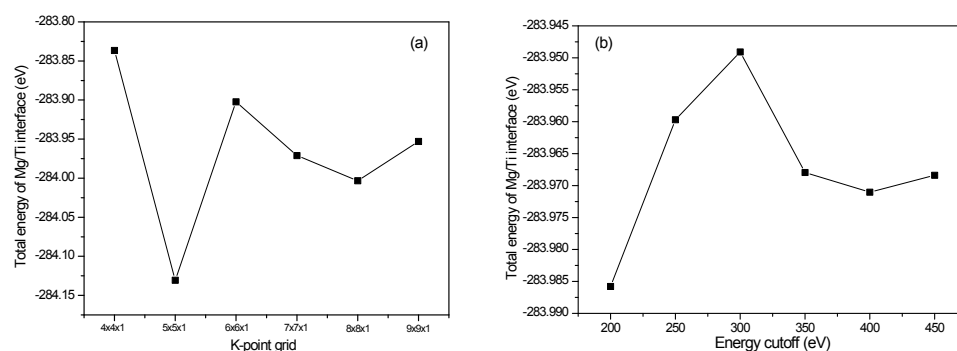

It can be seen that variation of three points in Fig. S1(a) is within 0.0001% related to the absolute value of the total energy. Therefore the 7x7x1 k-points were used. In Fig. S1(b), after 350 eV, the dependence of total energy on the energy cutoff is weak, and the value of 400 eV was employed.

Table S1 The adsorption sites (in fraction coordinates) of hydrogen in the interface model.

| H positions | <i>u</i> | <i>v</i> | <i>w</i> |
|-------------|----------|----------|----------|
| bridge      | 0.417    | 0.833    | 0.315    |
| fcc         | 0.500    | 0.500    | 0.315    |
| hcp         | 0.333    | 0.667    | 0.315    |
| top         | 0.167    | 0.833    | 0.315    |
| Mg-tet1     | 0.333    | 0.667    | 0.352    |
| Mg-tet2     | 0.667    | 0.333    | 0.377    |
| Mg-oct      | 0.500    | 0.500    | 0.364    |
| Ti-tet1     | 0.333    | 0.667    | 0.260    |
| Ti-tet2     | 0.667    | 0.333    | 0.280    |
| Ti-oct      | 0.500    | 0.500    | 0.270    |

\* Corresponding author's email address: sy@hitwh.edu.cn
